# Supplementary material for: Crystal structures of an E1–E2–ubiquitin thioester mimetic reveal molecular mechanisms of transthioesterification
Source: PubMed Central journal article supplement (PMC8062481; doi:10.1038/s41467-021-22598-y), 2021-04-22
Supplement: 41467_2021_22598_MOESM1_ESM.pdf [file 41467_2021_22598_MOESM1_ESM.pdf]

## Supplementary Information

### ***Crystal structures of an E1-E2-ubiquitin thioester mimetic reveal molecular mechanisms of transthioesterification***

Lingmin Yuan<sup>1,2</sup>, Zongyang Lv<sup>1,2</sup>, Melanie J. Adams<sup>1</sup>, & Shaun K. Olsen<sup>1,2\*</sup>

<sup>1</sup>Department of Biochemistry & Molecular Biology and Hollings Cancer Center, Medical University of South Carolina, Charleston, SC, 29425, USA

<sup>2</sup>Department of Biochemistry & Structural Biology University of Texas Health Science Center at San Antonio, San Antonio, TX, 78229 USA

\* Correspondence should be addressed to S.K.O. ([olsens@uthscsa.edu](mailto:olsens@uthscsa.edu))

**Keywords: E1, E2, E3, ubiquitin, cell cycle, conformational change**

#### **Supplementary Information Inventory:**

Supplementary Table 1-3

Supplementary Figures 1-9

## Supplementary Table 1 | Crystallographic Data and Refinement Statistics

| Uba1-Cdc34 <sup>A141K</sup> -Ub(t) complex   |                                                            |
|----------------------------------------------|------------------------------------------------------------|
| PDB ID                                       | 7K5J                                                       |
| Source                                       | APS 24 IDC                                                 |
| Wavelength (Å)                               | 0.979                                                      |
| Resolution Limits (Å)                        | 187.8-3.43 (3.62-3.43)                                     |
| Space Group                                  | P2 <sub>1</sub>                                            |
| Unit Cell (Å) <i>a</i> , <i>b</i> , <i>c</i> | 95.2, 272.9, 258.3                                         |
| Unit Cell (°) $\alpha$ , $\beta$ , $\gamma$  | 90, 94.6, 90                                               |
| Number of crystals                           | 2                                                          |
| Number of observations                       | 2359637                                                    |
| Number of reflections                        | 175210 (25582)                                             |
| Completeness (%)                             | 99.8 (100)                                                 |
| Mean <i>I</i> / $\sigma$ <i>I</i>            | 9.0 (1.6)                                                  |
| CC <sub>1/2</sub>                            | 0.993 (0.705)                                              |
| R <sub>merge</sub> <sup>a</sup>              | 0.287 (2.13)                                               |
| R <sub>pim</sub>                             | 0.084 (0.612)                                              |
| <b>Refinement Statistics</b>                 |                                                            |
| Resolution Limits (Å)                        | 136.5 -3.43 (3.51-3.43)                                    |
| # of reflections (work/free)                 | 172677/2014                                                |
| Completeness (%)                             | 99.0 (89.0)                                                |
| Protein/ligand atoms                         | 76482/161                                                  |
| R <sub>cryst</sub> <sup>b</sup>              | 0.203 (0.328)                                              |
| R <sub>free</sub> (2014 reflections)         | 0.246 (0.378)                                              |
| Bonds (Å)/ Angles (°)                        | 0.002/0.489                                                |
| B-factors: protein/ligand (Å <sup>2</sup> )  | 144.2/128.5                                                |
| Ramachandran plot statistics (%)             |                                                            |
| favored                                      | 98.0                                                       |
| allowed                                      | 2.2                                                        |
| outliers                                     | 0                                                          |
| MolProbity score                             | 1.24- 99 <sup>th</sup> percentile<br>(N=27675, 0 Å - 99 Å) |

Parentheses indicate statistics for the high-resolution data bin for x-ray data.

a.  $R_{merge} = \frac{\sum hkl \sum i |I(hkl)_i - \langle I(hkl) \rangle|}{\sum hkl \sum i \langle I(hkl)_i \rangle}$ .

b.  $R_{cryst} = \frac{\sum hkl |F_o(hkl) - F_c(hkl)|}{\sum hkl |F_o(hkl)|}$ , where  $F_o$  and  $F_c$  are observed and calculated structure factors, respectively.

**Supplementary Table 2 | Ordered amino acids in the Uba1-Cdc34<sup>A141K</sup>-Ub(t) structure by chain**

| Protein | Chain | Ordered Amino Acids                            |
|---------|-------|------------------------------------------------|
| Uba1    | A     | 12-592, 599-646, 653-745, 752-773 and 798-1024 |
|         | C     | 12-591, 599-645, 650-745, 752-773 and 797-1024 |
|         | D     | 12-590, 600-646, 650-745, 752-773 and 797-1024 |
|         | G     | 12-591, 600-646, 650-745, 752-773 and 797-1024 |
|         | K     | 12-589, 598-646, 650-773 and 797-1024          |
|         | I     | 12-590, 599-646, 650-773 and 797-1024          |
|         | S     | 12-589, 599-646, 650-773 and 797-1024          |
|         | U     | 12-590, 599-646, 650-745, 752-773 and 797-1024 |
| Cdc34   | B     | 6-95 and 117-179                               |
|         | E     | 7-94 and 117-179                               |
|         | F     | 7-95 and 117-179                               |
|         | H     | 7-96 and 118-179                               |
|         | L     | 6-98 and 118-179                               |
|         | J     | 6-98 and 118-180                               |
|         | T     | 6-97 and 118-178                               |
|         | V     | 7-89 and 118-180                               |
| Ub      | M     | 1-76                                           |
|         | N     | 1-76                                           |
|         | O     | 1-73                                           |
|         | P     | 1-76                                           |
|         | Q     | 1-76                                           |
|         | R     | 1-73                                           |
|         | W     | 1-70                                           |
|         | X     | 1-70                                           |

### Supplementary Table 3 | All PCR primers used in these studies

|                                                             |                                                                                                                                              |
|-------------------------------------------------------------|----------------------------------------------------------------------------------------------------------------------------------------------|
| <u>ScUba1 C600A</u><br>C600A_F<br>C600A_R                   | Mutated from ScUba1_WT<br>gaaaagtctatcccattggctaccctacgttctttcca<br>tgggaaagaacgtagggtagccaatgggatagactttc                                   |
| <u>ScUba1 D188A</u><br>D188A_F<br>D188A_R                   | Mutated from ScUba1_WT<br>cactggatggttcagccatcgagcccgatgga<br>tccatcgggctcgatggctgaaaccataccagt                                              |
| <u>ScUba1 E190A</u><br>E190A_F<br>E190A_R                   | Mutated from ScUba1_WT<br>gtatggttcagacatcgcgcccgatggaacagt<br>cactgttccatcgggcgcgatgtctgaaaccatac                                           |
| <u>ScUba1 T196A</u><br>T196A_F<br>T196A_R                   | Mutated from ScUba1_WT<br>catcgagcccgatggagcagtgaccatgctagatg<br>catctagcatggtcactgctccatcgggctcgatg                                         |
| <u>ScUba1 F236A</u><br>F236A_F<br>F236A_R                   | Mutated from ScUba1_WT<br>gaggtttggggcccgctgcattcagaattggtc<br>gaaccaattctgaatgcagcgggccccaaaacctc                                           |
| <u>ScUba1 E705A</u><br>E705A_F<br>E705A_R                   | Mutated from ScUba1_WT<br>caagactccaacggtgcaccattttggtccggt<br>accggacaaaatggtgcaccgttgaagtcttg                                              |
| <u>ScUba1 N703A</u><br>N703A_F<br>N703A_R                   | Mutated from ScUba1_WT<br>ggatccaagactccgccggtgaaccattttggt<br>accaaaatggttcaccggcggaagtcttggcatcc                                           |
| <u>ScUba1 T601V</u><br>T601V_F<br>T601V_R                   | Mutated from ScUba1_WT<br>gtctatcccattgtgtcctacgttcttccaaaca<br>tgtttgggaagaacgtaggacacacaatgggatagac                                        |
| <u>ScUba1 D188L/E190L</u><br>D188L/E190L_F<br>D188L/E190L_R | Mutated from ScUba1_WT<br>gaacctcgactggatggttctactgatcctgcccgatggaacagtgaccatgct<br>agcatggtcactgttccatcgggcaggatcagtgaaaccataccagtgcgaggttc |

|                                                                                                 |                                                                                                                                                     |
|-------------------------------------------------------------------------------------------------|-----------------------------------------------------------------------------------------------------------------------------------------------------|
| <u>ScUba1 D188L/T196V</u><br>D188L_F<br>D188L_R                                                 | Mutated from ScUba1_WT<br>cactggatggttcactgatcgagcccgatgga<br>tccatcgggctcgatcagtgaaccataccagt                                                      |
| T196V_F<br>T196V_R                                                                              | cccgatggaacagtggatgctagatgataacaga<br>tctgttatcatctagcatcaccactgttccatcggg                                                                          |
| <u>ScUba1 E190L/T196V</u><br>E190L_F<br>E190L_R                                                 | Mutated from ScUba1_WT<br>ggatggttcagacatcctgcccgatggaacagt<br>actgttccatcgggcaggatgtctgaaaccatacc                                                  |
| T196V_F<br>T196V_R                                                                              | cccgatggaacagtggatgctagatgataacaga<br>tctgttatcatctagcatcaccactgttccatcggg                                                                          |
| <u>ScUba1 D188L/E190L/T196V</u><br>D188L/E190L/T196V_F<br>D188L/E190L/T196V_R                   | Mutated from ScUba1_D188L/E190L<br>ctgatcctgcccgatggaacagtggatgctagatgataacagacacgggtgga<br>tccaaccctgtctgttatcatctagcatcaccactgttccatcgggcaggatcag |
| <u>ScUba1 D188L/E190L/T196V/L198R</u><br>D188L/E190L/T196V/L198V_F<br>D188L/E190L/T196V/L198V_R | Mutated from ScUba1_D188L/E190L/T196V<br>gatggaacagtggatgctgctagatgataacagacacgggt<br>gatggaacagtggatgctgctagatgataacagacacgggt                     |
| <u>ScUba1 N703D/E705K</u><br>N703D/E705K_F<br>N703D/E705K_R                                     | Mutated from ScUba1_WT<br>ctccccaggatgccaagactccgacggtaaaccattttggccgggtgctaagcgt<br>acgcttagcaccggaccaaaatggttaccgtcgggaagtcttggcatcctggggaag      |
| <u>ScUba1 T601V/N703D/E705K</u><br>N703D/E705K_F<br>N703D/E705K_R                               | Mutated from ScUba1_T601V<br>ctccccaggatgccaagactccgacggtaaaccattttggccgggtgctaagcgt<br>acgcttagcaccggaccaaaatggttaccgtcgggaagtcttggcatcctggggaag   |
| <u>ScUba1D544A</u><br>D544A_F<br>D544A_R                                                        | Mutated from ScUbc3_WT<br>ggattttgtaccaacgctctagccaatgtcgacgcaagaaca<br>tgttcttgcgtcgacattggctagagcgttggtgacaaaatcc                                 |
| <u>ScUbc3 A141K</u><br>A141K_F<br>A141K_R                                                       | Mutated from ScUbc3_WT<br>caatatcaactcgcaaaaaatgtcgatgccgctgt<br>acagcggcatcgacattttggcgagttgatattg                                                 |
| <u>ScUbc3 N50A</u><br>N50A_F<br>N50A_R                                                          | Mutated from ScUbc3_WT<br>gggttatggtgctagctgaggattccattatca<br>tgataaatggaatcctcagctagcaccataacacc                                                  |

|                                           |                                                                                                          |
|-------------------------------------------|----------------------------------------------------------------------------------------------------------|
| <u>ScUbc3 E122A</u><br>E122A_F<br>E122A_R | Mutated from ScUbc3_WT<br>cccgtgcagaccgtggcaagtgtgtgatctct<br>agagatcaacacacttgccacggctgcacggg           |
| <u>ScUbc3 S123A</u><br>S123A_F<br>S123A_R | Mutated from ScUbc3_WT<br>ccgtgcagaccgtggaagctgtgtgatctctatagt<br>actatagagatcaacacagcttccacggctgcacgg   |
| <u>ScUbc3 V118A</u><br>V118A_F<br>V118A_R | Mutated from ScUbc3_WT<br>gaaacgtggtccccgcgcagaccgtggaaagt<br>acttccacggctgcgcgggggaccacgttc             |
| <u>ScUbc3 I126A</u><br>I126A_F<br>I126A_R | Mutated from ScUbc3_WT<br>cccgtgcagaccgtggcaagtgtgtgatctct<br>agagatcaacacacttgccacggctgcacggg           |
| <u>ScUbc3 E133A</u><br>E133A_F<br>E133A_R | Mutated from ScUbc3_WT<br>ctatagtatctctattagcggaccccaatatcaact<br>agttgatattgggtccgctaataagagatactatag   |
| <u>ScUbc3 T120A</u><br>T120A_F<br>T120A_R | Mutated from ScUbc3_WT<br>gtgtcccccgctgcaggccgtggaaagtgtgtgatct<br>agatcaacacacttccacggcctgcacgggggaccac |
| <u>ScUbc3 N136A</u><br>N136A_F<br>N136A_R | Mutated from ScUbc3_WT<br>ctattagaggaccccgctatcaactgccagca<br>tgctggcgagttgatagcggggtcctctaataag         |
| <u>ScUbc3 S139A</u><br>S139A_F<br>S139A_R | Mutated from ScUbc3_WT<br>gaccccaatatcaacgcgccagcaaatgtcgat<br>atcgacattgctggcgctgatattggggtc            |
| <u>ScUbc3 Q119A</u><br>Q119A_F<br>Q119A_R | Mutated from ScUbc3_WT<br>cgtgtcccccgctggcgaccgtggaaagtgtgt<br>acacacttccacggctgcacgggggaccacg           |
| <u>ScUbc3 D134A</u><br>D134A_F<br>D134A_R | Mutated from ScUbc3_WT<br>gtatctctattagaggcccccaatatcaactcgcca<br>tggcgagttgatattgggggcctctaataagagatac  |

|                     |                                       |
|---------------------|---------------------------------------|
| <u>ScUbc3 L131A</u> | gatctctatagtatctgcattagaggacccaatatca |
| L131A_F             | tgatattggggctcctaatgcagatactatagagatc |
| L131A_R             |                                       |
| <u>ScUbc3 N87A</u>  | Mutated from ScUbc3_WT                |
| N87A_F              | gctatctaccatccagccggttacagggatggca    |
| N87A_R              | tgccatccctgtaaacggctggatgtagatagc     |

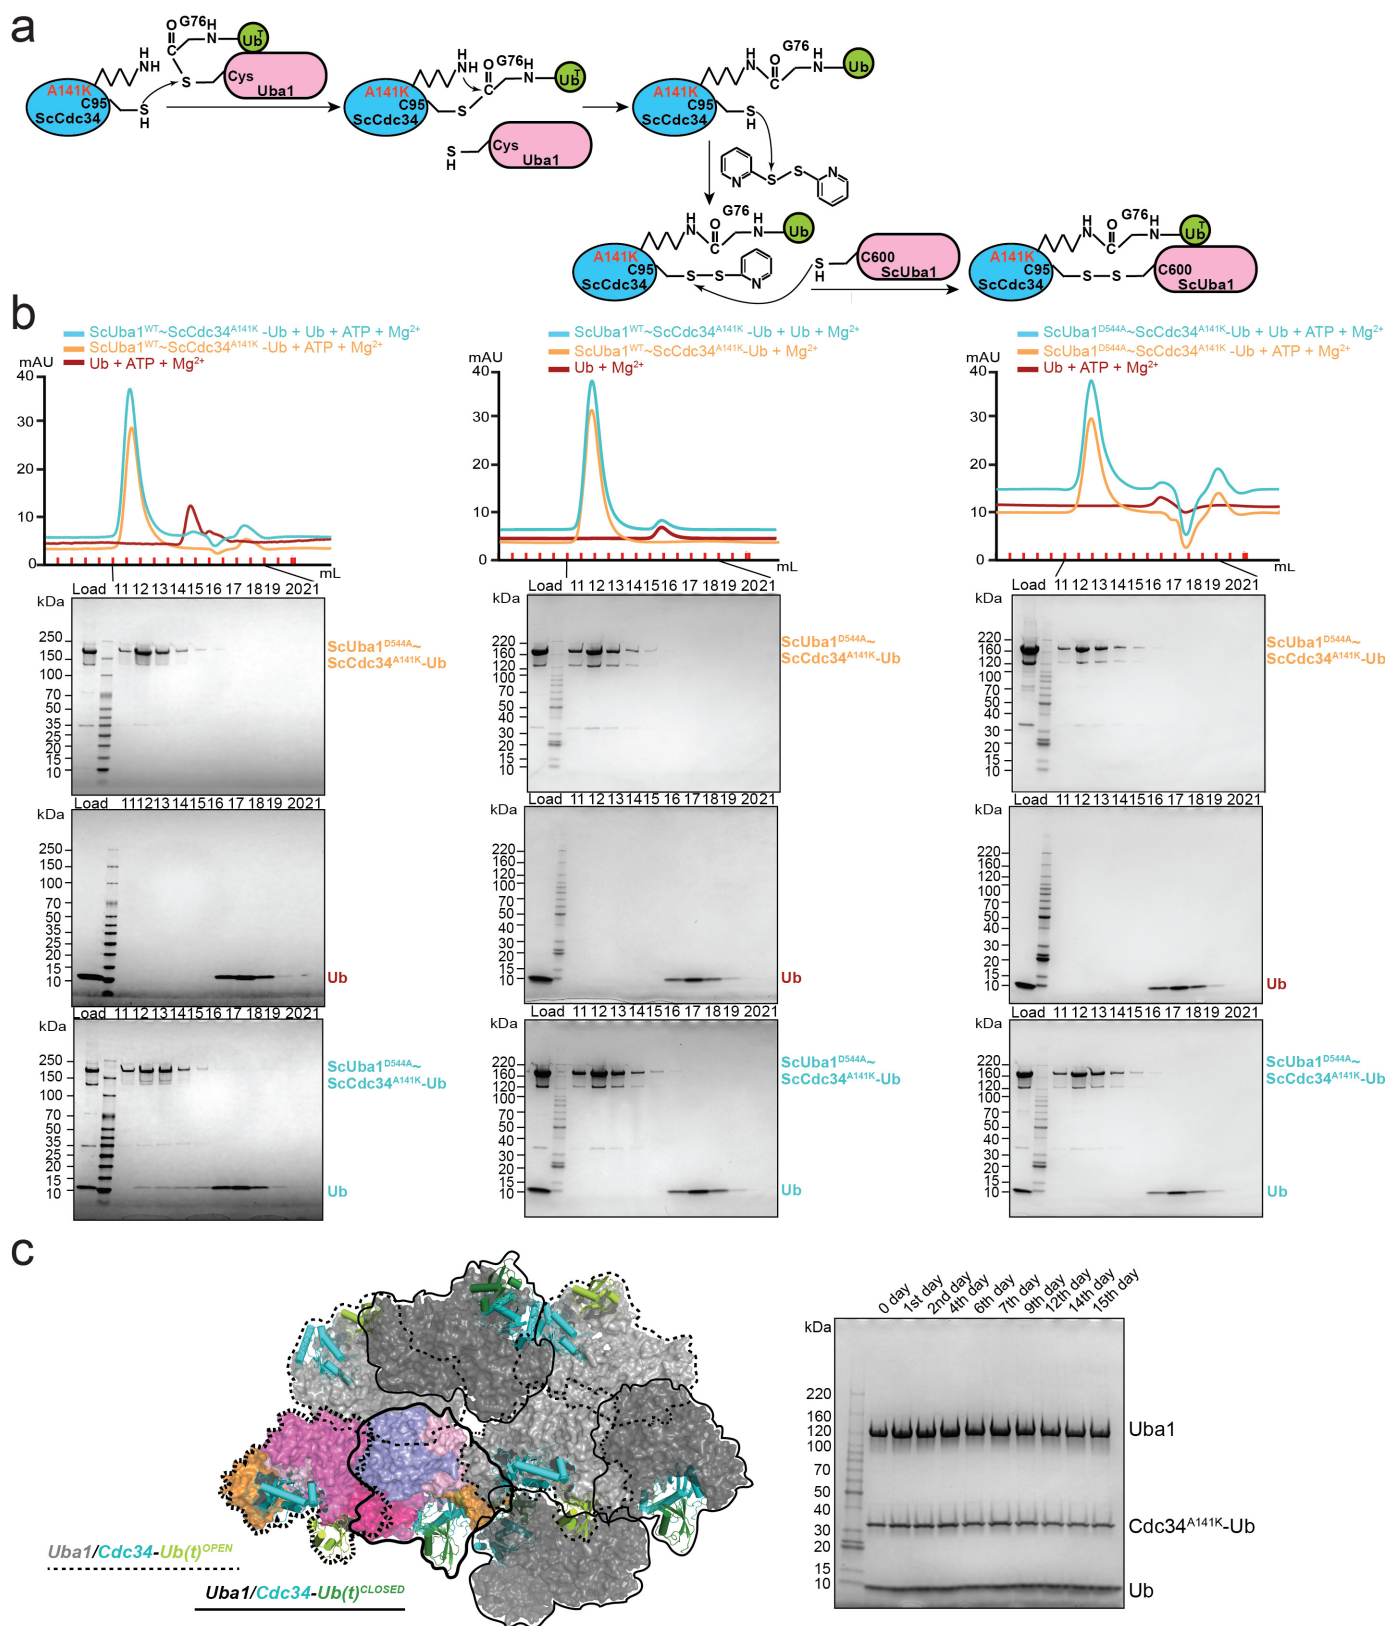

**Supplementary Figure 1 | Free Ub is adenylated in the Uba1/Cdc34-Ub(t) complex in solution with ATP·Mg<sup>2+</sup>**  
**a** strategy for producing E1/E2-Ub(t) mimetic. **b** *Left*, Free Ub is adenylated in the Uba1<sup>WT</sup>/Cdc34-Ub(t) crosslinking complex in the presence of ATP and Mg<sup>2+</sup>. *Middle*, Free Ub can not be adenylated in the Uba1<sup>WT</sup>/Cdc34-Ub(t) crosslinking complex without ATP and Mg<sup>2+</sup>. *Right*, Free Ub can not be adenylated in the adenylation deficient mutant Uba1<sup>D544A</sup>/Cdc34-Ub(t) crosslinking complex even in the presence of ATP and Mg<sup>2+</sup>. **c** *Left*, The Uba1/Cdc34<sup>A141K</sup>-Ub(t) structure contains eight copies in the crystallographic asymmetric unit where four Ub(t)s adopt open state and the other four adopt closed state arrangements. *Right*, SDS-PAGE gel of Uba1/Cdc34-Ub(t)/Ub(a)/ATP·Mg<sup>2+</sup> crystallization sample from different days under reducing loading buffer. All gel images are representative of independent technical replicates ( $n = 2$ ). Source data are provided as a Source Data file.



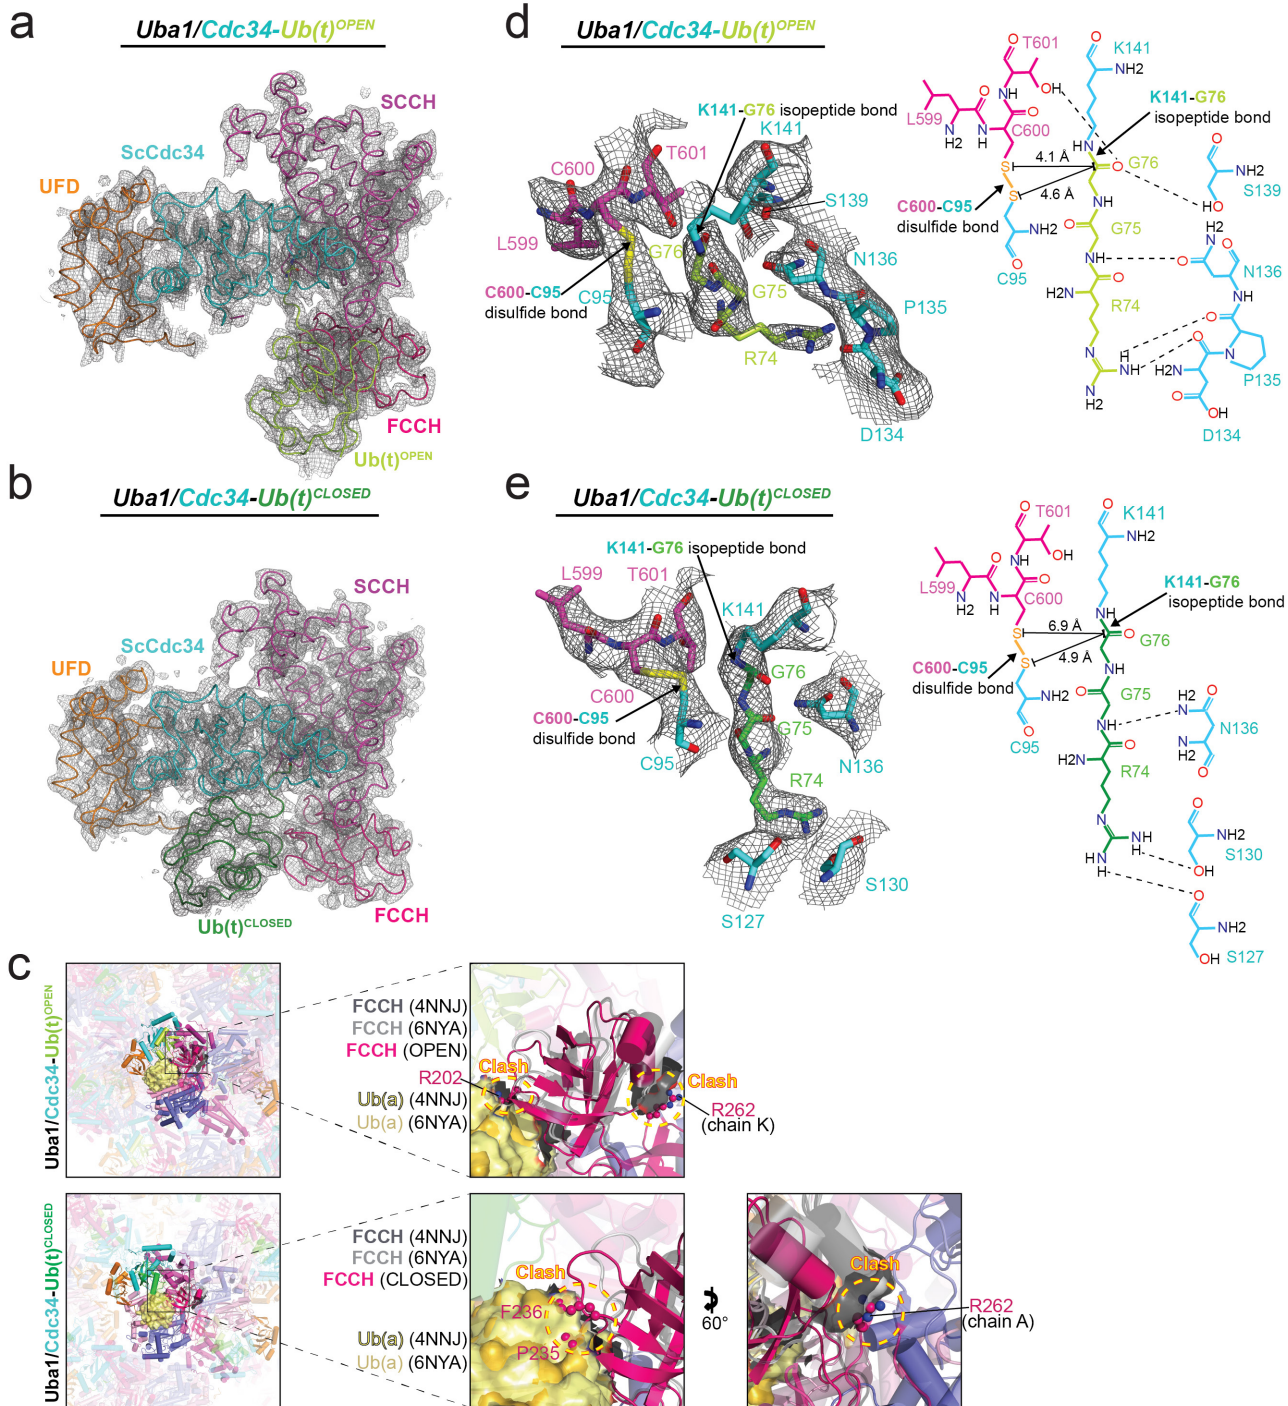

### Supplementary Figure 2 | Density maps of Cdc34-Ub(t) complex with Uba1

**a** 2Fo-Fc electron density maps contoured at  $1.0\sigma$  for *Uba1/Cdc34-Ub(t)<sup>OPEN</sup>* overall structure with Ca-trace shown. **b** 2Fo-Fc electron density maps contoured at  $1.0\sigma$  for *Uba1/Cdc34-Ub(t)<sup>CLOSED</sup>* overall structure with Ca-trace shown. **c** *Top*, Symmetry mates within 10 Å of the *Uba1/Cdc34-Ub(t)<sup>OPEN</sup>* structure. *Uba1* domains are colored as in Fig. 2: IAD is in slate, AAD is in pink, FCCH is in hotpink, SCCH is in light magenta, UFD is in orange. *Cdc34<sup>A141K</sup>* is colored cyan, and *Ub(t)<sup>OPEN</sup>* is colored limon. *Ub(a)*s from *ScUba1/Ub(t)/Ub(a)* (PDB: 4NNJ) and *Uba1/Cdc34/Ub(a)* (PDB: 6NYA) are docked into *Uba1/Cdc34-Ub(t)<sup>OPEN</sup>* structure by superposition of *Uba1* AD domains. *Ub(a)* (PDB: 4NNJ), *ScUba1 FCCH* (PDB: 4NNJ), *Ub(a)* (PDB: 6NYA), *ScUba1 FCCH* (PDB: 6NYA) are colored and labeled. *Ub(a)* (PDB: 4NNJ) and *Ub(a)* (PDB: 6NYA) are shown as surface representation. Arg202 of FCCH (OPEN) would clash with the docked *Ub(a)*s, but crystal packing from adjacent Arg262 (chain K) perturbed FCCH(OPEN) orientation to accommodate *Ub(a)*s and consequently occludes *Ub(a)* from occupying the AAD binding site. *Bottom*, Symmetry mates within 10 Å of the *Uba1/Cdc34-Ub(t)<sup>CLOSED</sup>* structure. *Uba1* domains are colored as in Fig. 2: IAD is in slate, AAD is in pink, FCCH is in hotpink, SCCH is in light magenta, UFD is in orange. *Cdc34<sup>A141K</sup>* is colored cyan, and *Ub(t)<sup>CLOSED</sup>* is colored forest. *Ub(a)*s from *ScUba1/Ub(t)/Ub(a)* (PDB: 4NNJ) and *Uba1/Cdc34/Ub(a)* (PDB: 6NYA) are docked into *Uba1/Cdc34-Ub(t)<sup>CLOSED</sup>* structure by superposition of *Uba1* AD domains. *Ub(a)* (PDB: 4NNJ), *ScUba1 FCCH* (PDB: 4NNJ), *Ub(a)* (PDB: 6NYA), *ScUba1 FCCH* (PDB: 6NYA) are colored and labeled. *Ub(a)* (PDB: 4NNJ) and *Ub(a)* (PDB: 6NYA) are shown as surface representation. Pro235 and Phe236 of FCCH (CLOSED) would clash with the docked *Ub(a)*s, but crystal packing from adjacent Arg262 (chain A) perturbed FCCH(CLOSED) orientation to accommodate *Ub(a)*s and consequently occludes *Ub(a)* from occupying the AAD binding site. **d** *Left*, 2Fo-Fc electron density maps contoured at  $1.0\sigma$  for E1, E2, *Ub(t)* active sites in *Uba1/Cdc34-Ub(t)<sup>OPEN</sup>* structure. *Right*, Chemical drawing as shown in **d** *Left*. **e** *Left*, 2Fo-Fc electron density maps contoured at  $1.0\sigma$  for E1, E2, *Ub(t)* active sites *Uba1/Cdc34-Ub(t)<sup>CLOSED</sup>* structure. *Right*, Chemical drawing as shown in **e** *Left*.

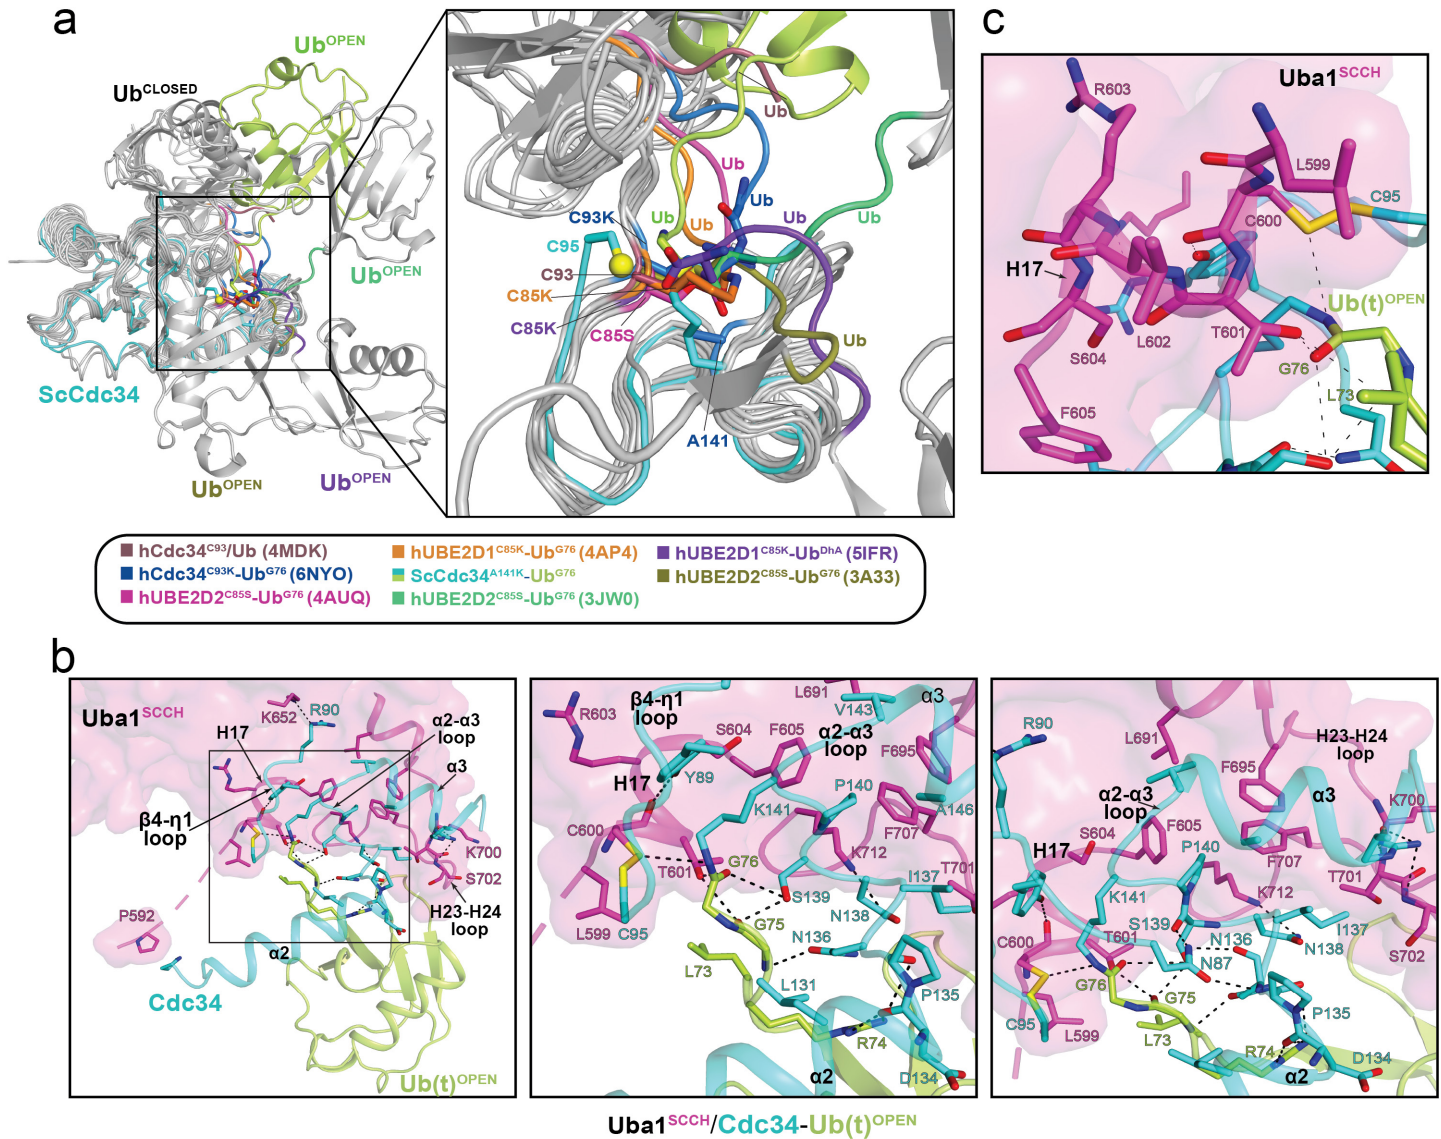

**Supplementary Figure 3 | Structure analysis for Uba1/Cdc34-Ub(t)<sup>OPEN</sup>**

**a** Comparison of E2-Ub open and closed structures by E2 superposition. **b** Interfaces among Uba1 SCCH domain, Cdc34 and Ub(t)<sup>OPEN</sup>. **c** N-Terminal of Uba1 H17 is in proximity to the Ub(t)<sup>OPEN</sup> Gly76 carbonyl oxygen where the positive electrostatic potential from the helix dipole could contribute to stabilization of the transition state.

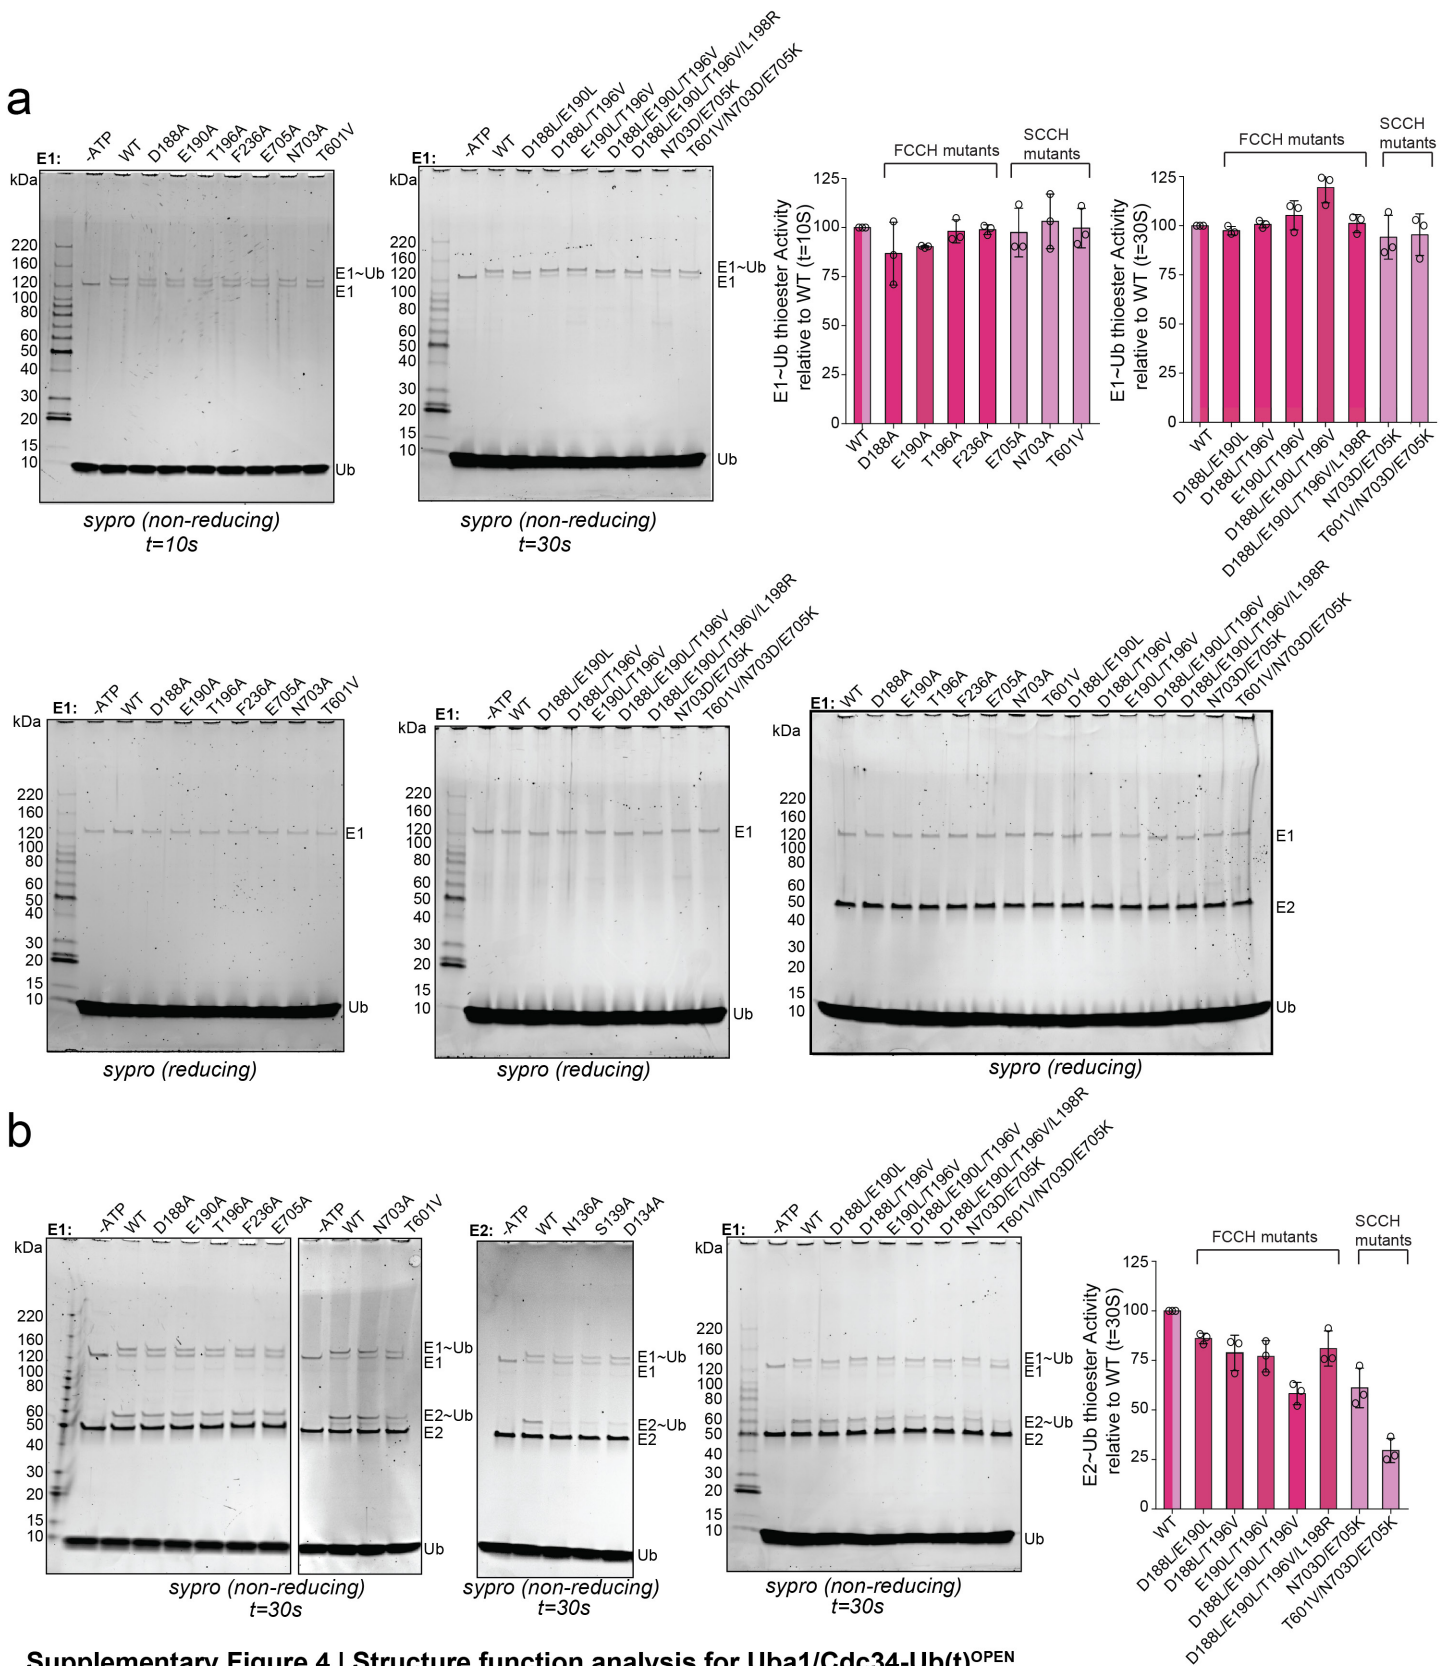

**Supplementary Figure 4 | Structure function analysis for Uba1/Cdc34-Ub(t)<sup>OPEN</sup>**

**a** *Top*, E1~Ub thioester assay and quantification for the indicated ScUba1 residues involved in Uba1/Ub(t) interface. Data are represented by mean  $\pm$  SD with three independent technical replicates labeled above and individual replicates shown as black circles. Gel images are representative of independent technical replicates ( $n = 3$ ). *Bottom*, E1~Ub thioester assay and E2~Ub thioester assay for the indicated ScUba1 residues involved in Uba1/Ub(t) interface in presence of DTT. Gel images are representative of independent technical replicates ( $n = 2$ ). **b** *Left and Middle*, Full gels for E1-E2 thioester transfer assay in Fig. 3. Gel images are representative of independent technical replicates ( $n = 3$ ). *Right*, E1~Ub thioester assay and quantification for the indicated ScUba1 residues involved in Uba1/Ub(t) interface. Data are represented by mean  $\pm$  SD with three independent technical replicates labeled above and individual replicates shown as black circles. Gel image is representative of independent technical replicates ( $n = 3$ ). Source data for all panels in this figure are provided as a Source Data file.

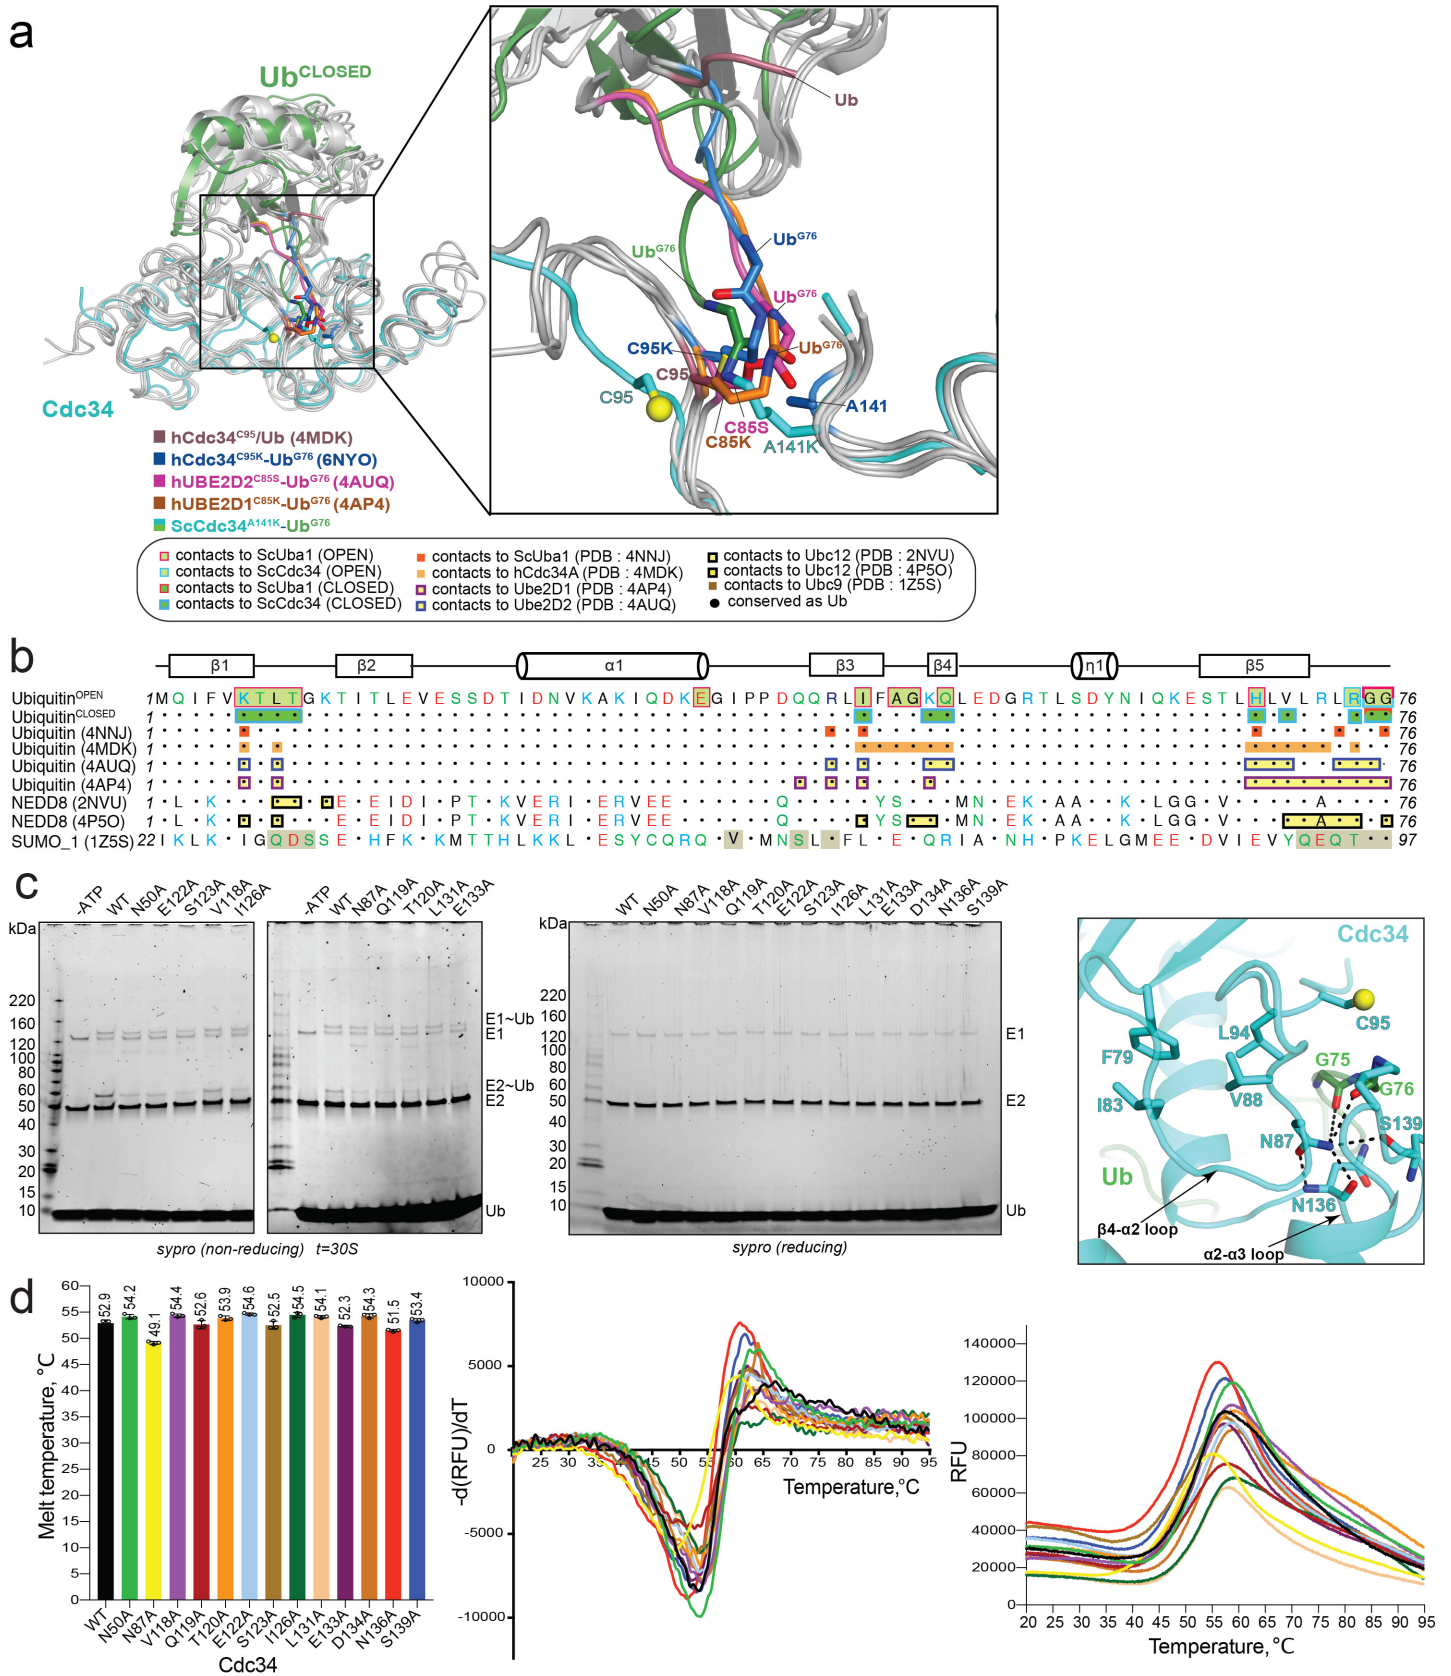

### Supplementary Figure 5 | Structure function analysis for Uba1/Cdc34-Ub(t)<sup>CLOSED</sup>

**a** Comparison of E2-Ub closed structures by E2 superposition. **b** Sequence alignment of Ub, Nedd8 and SUMO\_1 with Ub's secondary structure cartoon shown above sequence. Shaded boxes in Ub(t)<sup>OPEN</sup> indicate residues that interact with Uba1, and others indicate residues of Ub, Nedd8 or SUMO\_1 that interact with E2s. **c** *Left*, Full gels for E1-E2 thioester transfer assay in Fig. 4. Gel images are representative of independent technical replicates ( $n = 3$ ). *Middle*, Full gel for E1-E2 thioester transfer assay in presence of DTT. Gel image is representative of independent technical replicates ( $n = 2$ ). *Right*, Cdc34 Asn87 involves in intramolecular interaction. **d** Thermal shift assay of Cdc34 WT and mutants for E1-E2 thioester transfer in Fig. 3 and Fig. 4. Data are represented by mean  $\pm$  SD with three independent technical replicates labeled above and individual replicates shown as black circles. Source data for all panels in this figure are provided as a Source Data file.

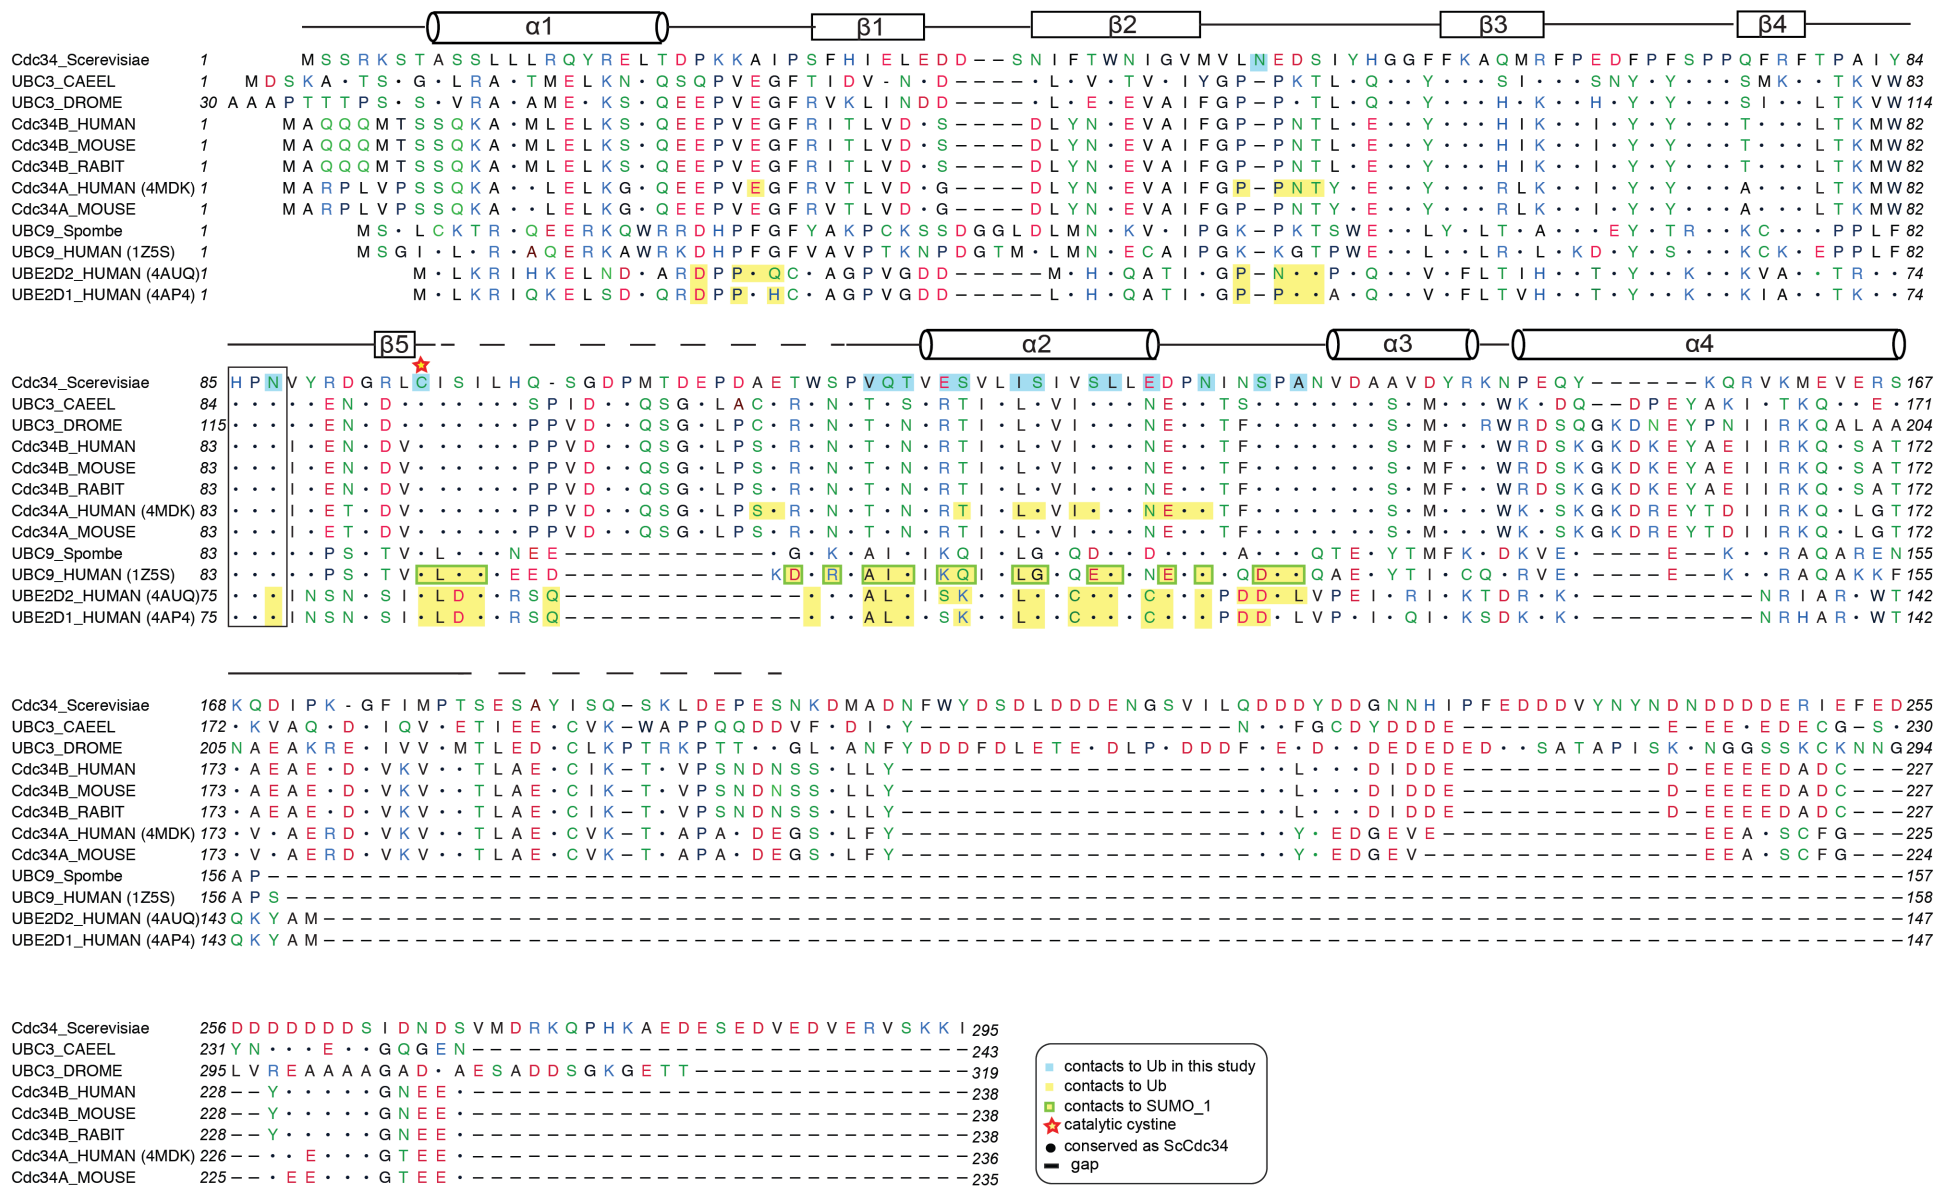

### Supplementary Figure 6 | Sequence alignment of Cdc34 across different species

Secondary structure of ScCdc34 in our study is represented above the aligned sequence. Shaded boxed residues of E2s indicate contacts on UBLs. HPN motif is boxed. A region of disorder in the ScCdc34 structure is indicated as a dashed line.

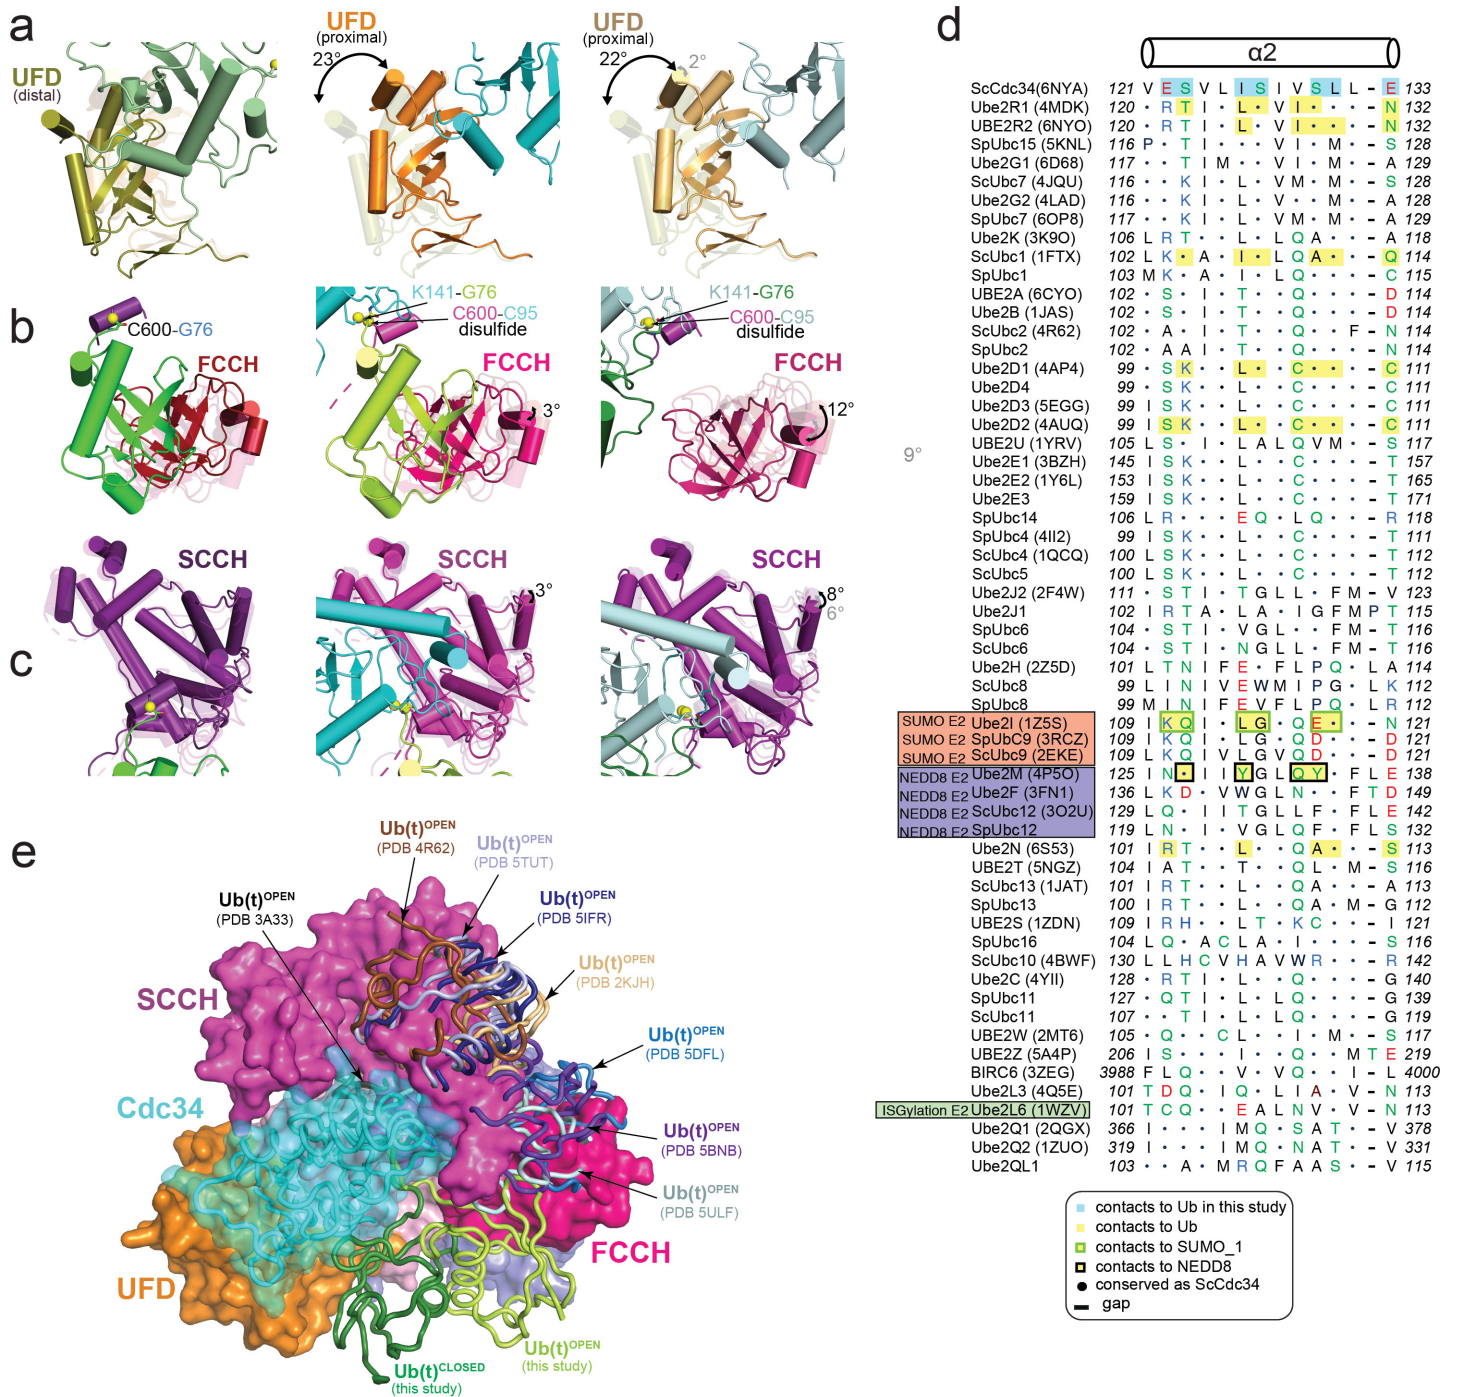

### Supplementary Figure 7 | Comparison of docking model, Uba1/Cdc34<sup>OPEN</sup> and Uba1/Cdc34<sup>CLOSED</sup> structures

**a** UFD domain rotates ~23° after Cdc34 binding for E1 E2 catalytic sites coming into proximity. With regard to the docking model, the domain rotation is marked black, while with regard to the open structure, the domain rotation of closed structure is marked gray. Docking model (*Left*), open structure (*Middle*), and closed structure (*Right*) represented as in Fig. 5. **b** FCCH domain comparison among these three structures. With regard to the docking model, the domain rotation is marked black, while with regard to the open structure, the domain rotation of closed structure is marked gray. Docking model (*Left*), open structure (*Middle*), and closed structure (*Right*) represented as in Fig. 5. **c** SCCH domain comparison among these three structures. With regard to the docking model, the domain rotation is marked black, while with regard to the open structure, the domain rotation of closed structure is marked gray. Docking model (*Left*), open structure (*Middle*), and closed structure (*Right*) represented as in Fig. 5. **d** Structure-based sequence alignment for E2s' helix  $\alpha 2$  depicting regions contacting Ub<sup>CLOSED</sup> or Ub<sup>OPEN</sup>. **e** Model of Ub(t)<sup>OPEN</sup> positions on Uba1 derived by superposition of E2s from available E2~Ub<sup>OPEN</sup> thioester structures on to Cdc34 in the Uba1/Cdc34<sup>CLOSED</sup> structure. Uba1 and Cdc34 are in surface representation with domains colored as in Figure 2.

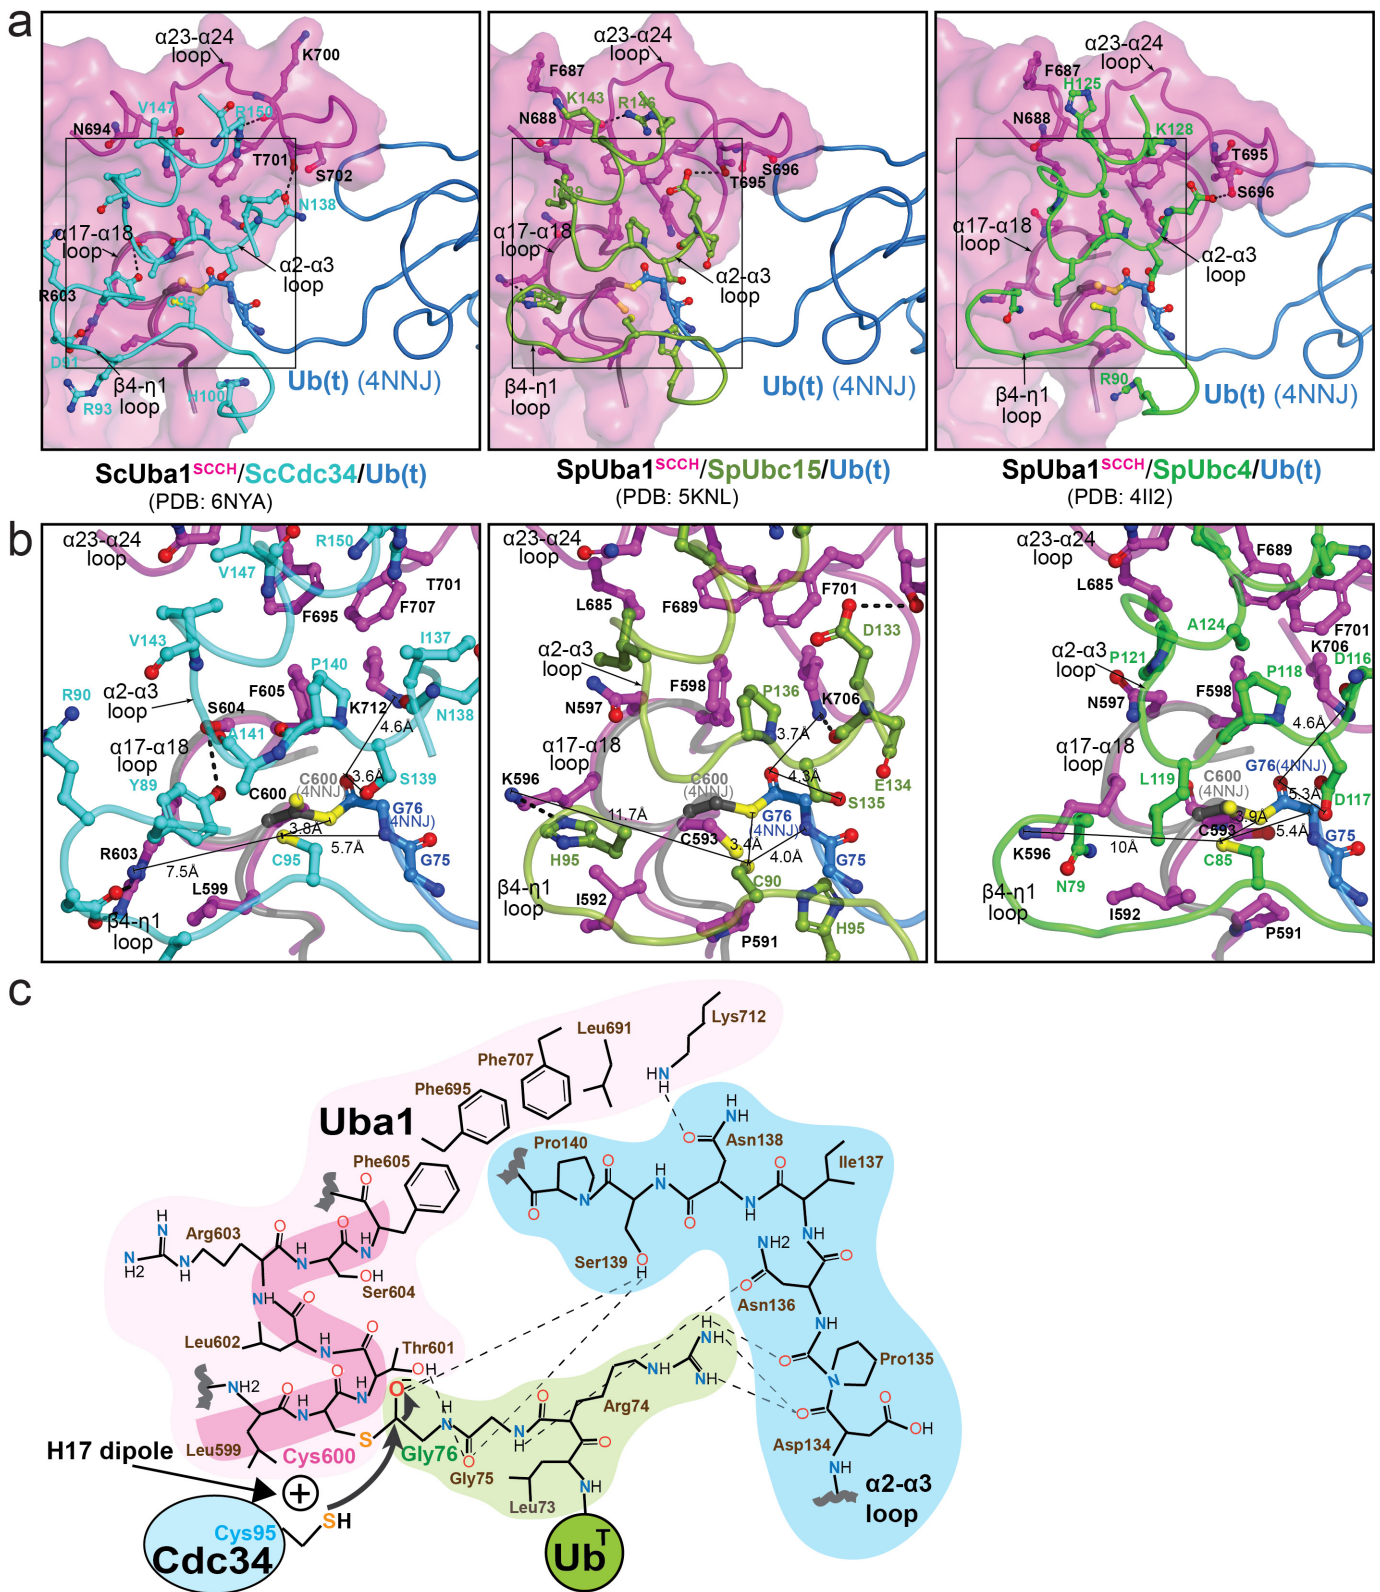

**a**

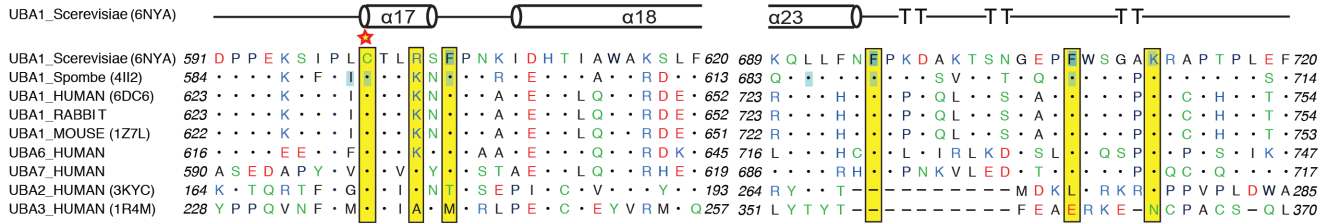

**b**

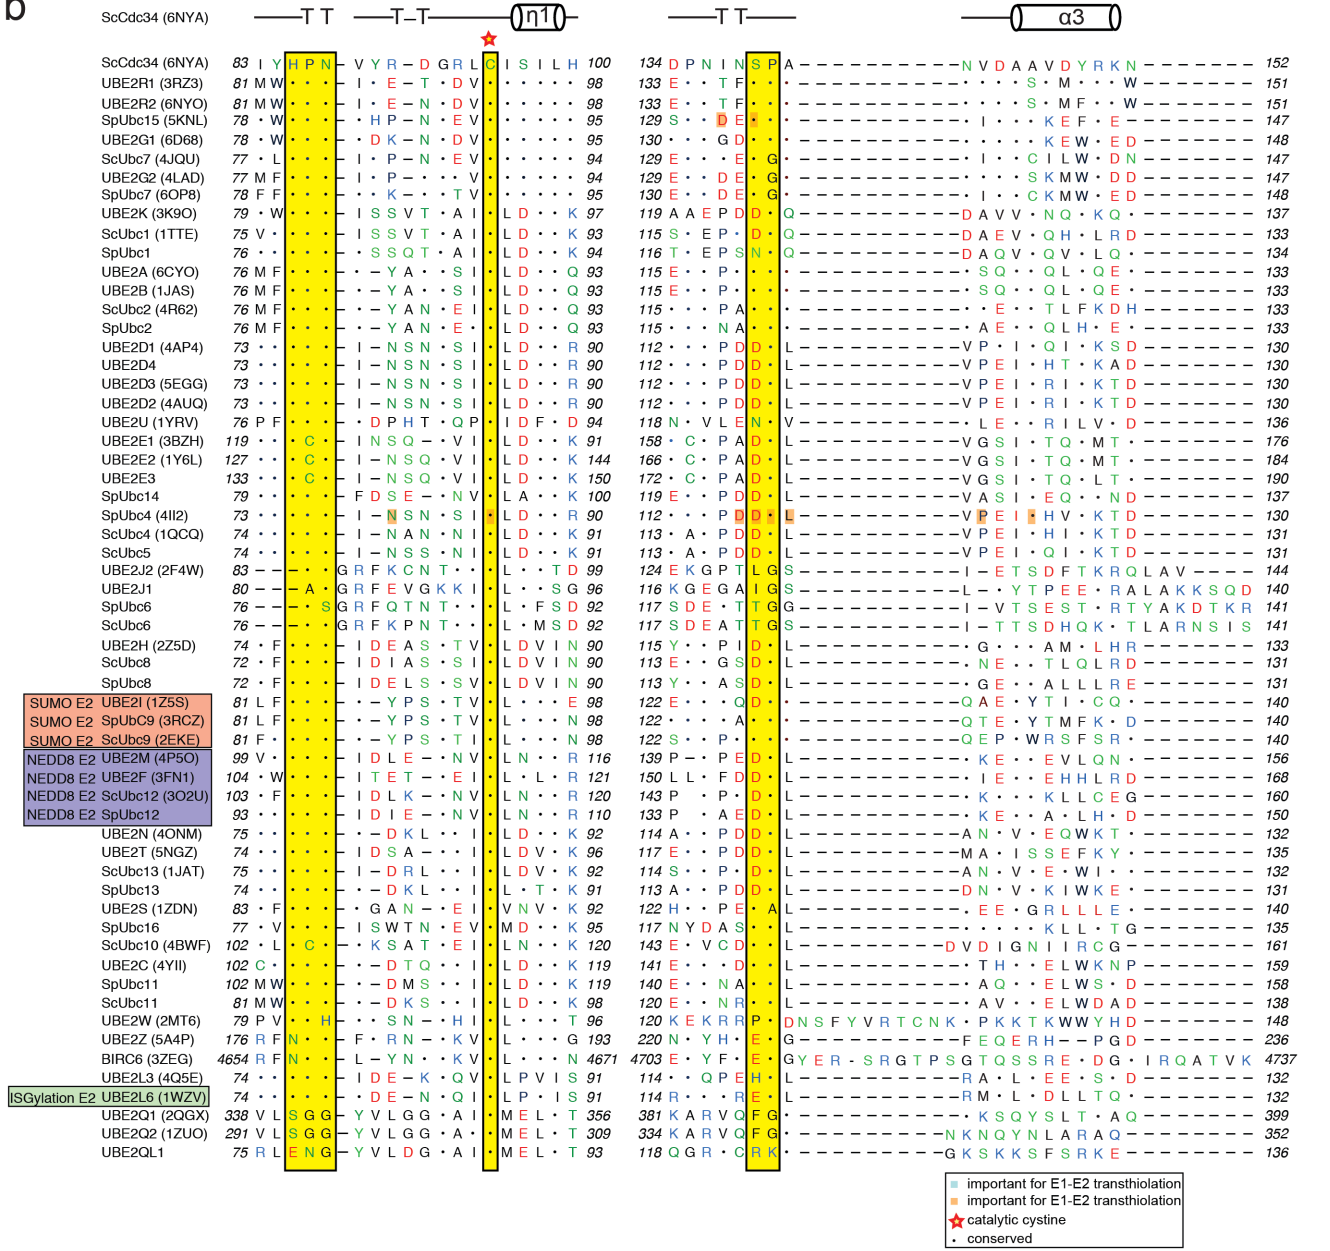

**Supplementary Figure 9 | Structure based sequence alignment of E1s and E2s.**

**a** Sequence alignment of Uba1 across species and Uba6, ISGylation E1 Uba7 and Sumo E1 Uba 2 and Nedd8 E1 Uba3. Secondary structure of ScUba1 (6NYA) is represented above the aligned sequence. Shaded boxed residues indicate residues important for thioester transfer. Residues related to E1-E2catalysis are boxed. **b** Sequence alignment of *S. cerevisiae* E2s, *S.pombe* E2s and activated human E2s. Secondary structure of ScCdc34 (6NYA) is represented above the aligned sequence. Shaded boxed residues indicate residues important for thioester transfer. Residue related to E1-E2 catalysis are boxed. HPN motif is boxed.
